# Supplementary material for: The diagnostic performance of CA125 for the detection of ovarian and non-ovarian cancer in primary care: A population-based cohort study
Source: PLOS journal article supplement (doi:10.1371/journal.pmed.1003295), 2020-10-28
Supplement: S6 (10.1371/journal.pmed.1003295.s006) [file journal.pmed.1003295.s006]

**S2 Table. Ovarian cancer by stage of diagnosis.**

| Stage   | N (%)      |
|---------|------------|
| I       | 138 (30.3) |
| II      | 34 (7.5)   |
| III     | 142 (31.1) |
| IV      | 67 (14.7)  |
| Missing | 75 (16.4)  |
